# Supplementary material
Source: Research Square preprint supplement (doi:10.21203/rs.3.rs-9162140/v1)
Supplement: Supplementary file 1 [file d36de0d72cd63278f55cbc06.docx]

| Variable | Mean | Standard Deviation | Minimum | Maximum |
| --- | --- | --- | --- | --- |
| Age (years) | 56,6 | 13,2 | 39 | 85 |
| ODI | 23,6 | 14,2 | 0 | 70 |
| VAS | 4,5 | 2,3 | 0 | 9 |
| TK (°) | 44,1 | 13,8 | 15 | 90 |
| LL (°) | 55,3 | 13,0 | 8 | 86 |
| SS (°) | 36,9 | 9,0 | 8 | 57 |
| PT (°) | 16,0 | 9,0 | -9 | 46 |
| PI (°) | 52,8 | 10,9 | 23 | 85 |
| SVA (mm) | 4,8 | 38,2 | -63 | 141 |
| LL-TK | 11,3 | 11,7 | -18 | 41 |
| PI-LL | -2,5 | 12,8 | -29 | 47 |
| ODI indicates Oswestry Disability index; VAS, visual analogue scale; TK, thoracic kyphosis; LL, lumbar lordosis; SS, sacral slope; PT, pelvic tilt; PI, pelvic incidence; SVA, sagittal vertical axis; LL-TK, lumbar lordosis minus thoracic kyphosis; PI-LL, pelvic incidence minus lumbar lordosis. | | | | |
|  |

**Table 1** – General Characteristics and Radiographic Parameters

| Variable | Pearson correlation coefficient (r) | P |
| --- | --- | --- |
| Age | 0,5043 | <0,001 |
| ODI | 0,3994 | <0,001 |
| VAS | 0,4181 | <0,001 |
| TK | 0,0981 | 0,245 |
| LL | -0,2823 | <0,001 |
| SS | -0,0094 | 0,912 |
| PT | 0,2042 | 0,015 |
| PI INCID | 0,1604 | 0,057 |
| LL-TK | -0,4299 | <0,001 |
| PI-LL | 0,4244 | <0,001 |
| ODI indicates Oswestry Disability index; VAS, visual analogue scale; TK, thoracic kyphosis; LL, lumbar lordosis; SS, sacral slope; PT, pelvic tilt; PI, pelvic incidence; SVA, sagittal vertical axis; LL-TK, lumbar lordosis minus thoracic kyphosis; PI-LL, pelvic incidence minus lumbar lordosis. | | |

**Table 2** - Correlation between SVA and other variables

| Variable | Pearson correlation coefficient (r) | P |
| --- | --- | --- |
| Age | -0,3936 | <0,001 |
| ODI | -0,2664 | 0,001 |
| VAS | -0,3067 | <0,001 |
| TK | -0,4891 | <0,001 |
| LL | 0,3801 | <0,001 |
| SS | 0,4724 | <0,001 |
| PT | -0,1114 | 0,187 |
| PI | 0,2982 | <0,001 |
| SVA | -0,4299 | <0,001 |
| PI-LL | -0,1327 | 0,116 |
| ODI indicates Oswestry Disability index; VAS, visual analogue scale; TK, thoracic kyphosis; LL, lumbar lordosis; SS, sacral slope; PT, pelvic tilt; PI, pelvic incidence; SVA, sagittal vertical axis; LL-TK, lumbar lordosis minus thoracic kyphosis; PI-LL, pelvic incidence minus lumbar lordosis. | | |

**Table 3** - Correlation between  LL-TK and other variables

|  | Groups | | p | valor T |
| --- | --- | --- | --- | --- |
| SVA>40 | SVA<40 |
| Age | 67,89655 | 54,08850 | <0,001 | 5,975834 |
| ODI | 36,48276 | 20,28319 | <0,001 | 6,14624 |
| VAS | 6,89655 | 3,87611 | <0,001 | 7,45075 |
| TK | 46,17241 | 43,51327 | 0,356 | 0,92660 |
| LL | 48,93103 | 56,99115 | 0,003 | -3,06747 |
| SS | 36,37931 | 36,98230 | 0,748 | -0,32136 |
| PT | 18,34483 | 15,36283 | 0,110 | 1,60673 |
| PI | 54,72414 | 52,34513 | 0,295 | 1,05013 |
| SVA | 62,03448 | -9,84071 | <0,001 | 13,89197 |
| LL-TK | 2,75862 | 13,47788 | <0,001 | -4,73220 |
| PI-LL | 5,79310 | -4,64602 | <0,001 | 4,15067 |
| ODI indicates Oswestry Disability index; VAS, visual analogue scale; TK, thoracic kyphosis; LL, lumbar lordosis; SS, sacral slope; PT, pelvic tilt; PI, pelvic incidence; SVA, sagittal vertical axis; LL-TK, lumbar lordosis minus thoracic kyphosis; PI-LL, pelvic incidence minus lumbar lordosis | | | | |

**Table 4** - Comparison of Clinical and Radiographic Parameters Between the Two Groups
